# Supplementary material
Source: PubMed Central journal article supplement (PMC5140694)
Supplement: NIHMS827170-supplement-5.pdf [file NIHMS827170-supplement-5.pdf]

**Supplementary Table S1:** Variants identified in pre-treatment and post-treatment tumor targeted next-generation sequencing (NGS).

| <b>Pre-treatment</b><br>(~30% tumor content)                           | <b>Allelic fraction</b> | <b>Post-treatment</b><br>(~80% tumor content)                          | <b>Allelic fraction</b> |
|------------------------------------------------------------------------|-------------------------|------------------------------------------------------------------------|-------------------------|
| EGFR<br>c.2238_2252delATTAAGAGA<br>AGCAAC (p.L747_T751del),<br>exon 19 | 22%<br>(133/603)        | EGFR<br>c.2238_2252delATTAAGAGA<br>AGCAAC (p.L747_T751del),<br>exon 19 | 11%<br>(37/336)         |
| TP53 c.796G>A (p.G266R),<br>exon 8                                     | 25%<br>(74/296)         | TP53 c.796G>A (p.G266R),<br>exon 8                                     | 22%<br>(31/141)         |
| BRCA1 c.4036G>A<br>(p.E1346K), exon 10                                 | 29%<br>(168/581)        | BRCA1 c.4036G>A<br>(p.E1346K), exon 10                                 | 34%<br>(101/297)        |
| GLI3 c.93G>C (p.E31D),<br>exon 2                                       | 10%<br>(54/538)         | GLI3 c.93G>C (p.E31D),<br>exon 2                                       | 7%<br>(24/339)          |
| JAK3 c.2681-4C>T ( )                                                   | 69%<br>(157/227)        | JAK3 c.2681-4C>T ( )                                                   | 61%<br>(51/84)          |
| PTPRD c.239C>T (p.S80L),<br>exon 11                                    | 45%<br>(233/518)        | PTPRD c.239C>T (p.S80L),<br>exon 11                                    | 46%<br>(151/328)        |
| SMAD4 c.1091T>G<br>(p.L364W), exon 9                                   | 27%<br>(148/548)        | SMAD4 c.1091T>G<br>(p.L364W), exon 9                                   | 21%<br>(68/325)         |
| Not Detected                                                           | N/A                     | REL c.1324G>T (p.G442C),<br>exon 11                                    | 10%<br>(44/437)         |
| Not Detected                                                           | N/A                     | MET c.3683A>T (p.D1228V),<br>exon 19                                   | 43%<br>(309/718)        |

Note: paired germline NGS was not performed so some variants, such as the high allelic fraction JAK3 mutation, may be germline in nature and not somatic
