# Supplementary material
Source: PubMed Central journal article supplement (PMC5140694)
Supplement: NIHMS827170-supplement-6.pdf [file NIHMS827170-supplement-6.pdf]

**Supplementary Table S2:** Type I and II MET kinase inhibitors and key trials studying their activity lung cancer populations enriched for MET-dependence.

| <b>MET kinase inhibitor</b> | <b>MET amplification or MET exon 14 mutation</b> | <b>Acquired resistance to EGFR TKI</b>                                                    |
|-----------------------------|--------------------------------------------------|-------------------------------------------------------------------------------------------|
| Type I inhibitors           |                                                  |                                                                                           |
| Crizotinib                  | NCT00585195<br>NCT02664935                       | NCT01121575 (with dacomitinib)                                                            |
| Savolitinib                 |                                                  | NCT02374645 (with gefitinib)<br>NCT02143466 (with osimertinib)                            |
| INC280                      | NCT02414139<br>NCT02276027                       | NCT01610336 (with gefitinib)<br>NCT02468661 (with erlotinib)<br>NCT02335944 (with EGF816) |
| MSC2156119J                 |                                                  | NCT01982955 (with gefitinib)                                                              |
| Type II inhibitors          |                                                  |                                                                                           |
| Cabozantinib                | NCT01639508                                      | NCT01866410 (with erlotinib)                                                              |
| MGCD265                     | NCT02544633                                      |                                                                                           |
| Merestinib                  |                                                  |                                                                                           |
