# Supplementary material
Source: PubMed Central journal article supplement (PMC5140694)

# Supplementary Figure S1

**A**

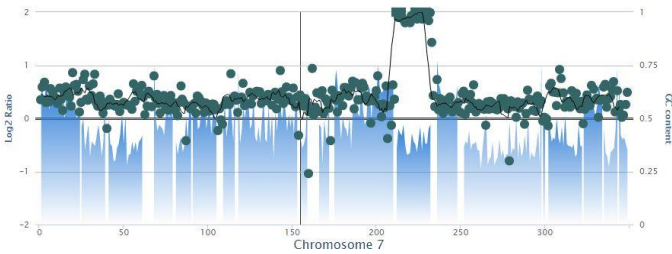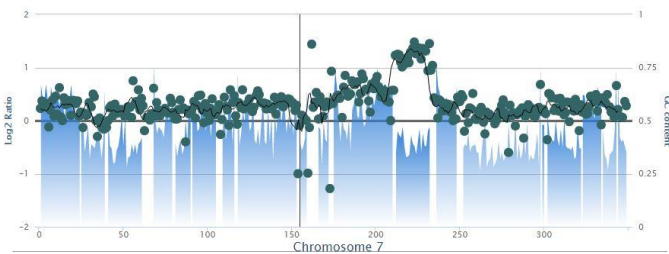

**B**

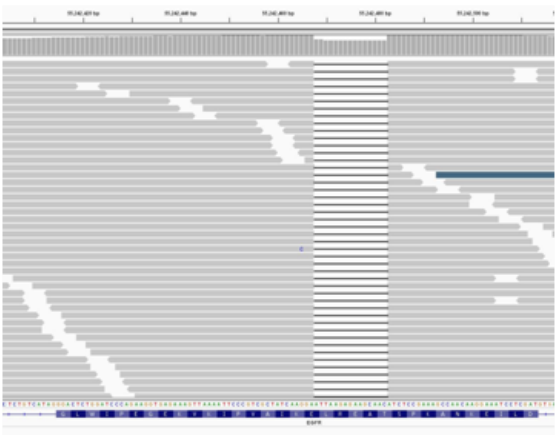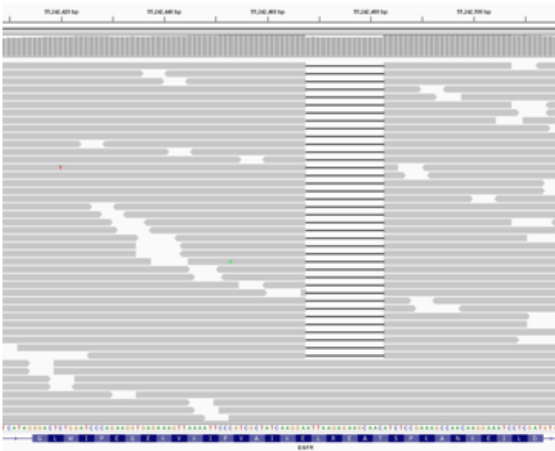

**C**

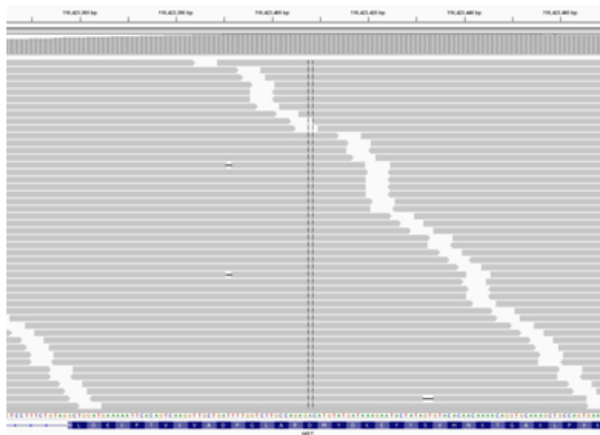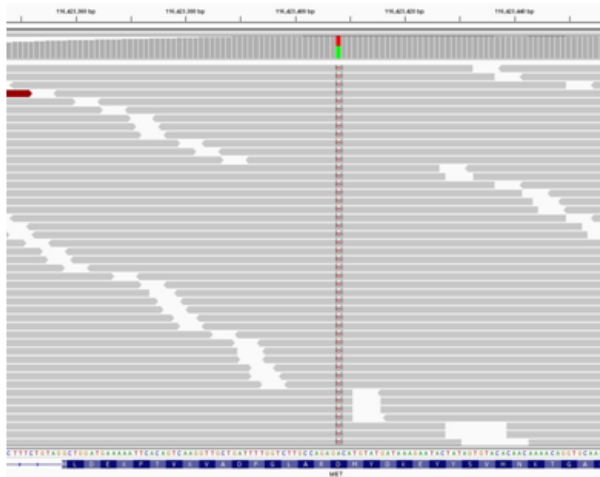

Supplement: NIHMS827170-supplement-3.pdf [file NIHMS827170-supplement-3.pdf]

# Supplementary Figure S2.

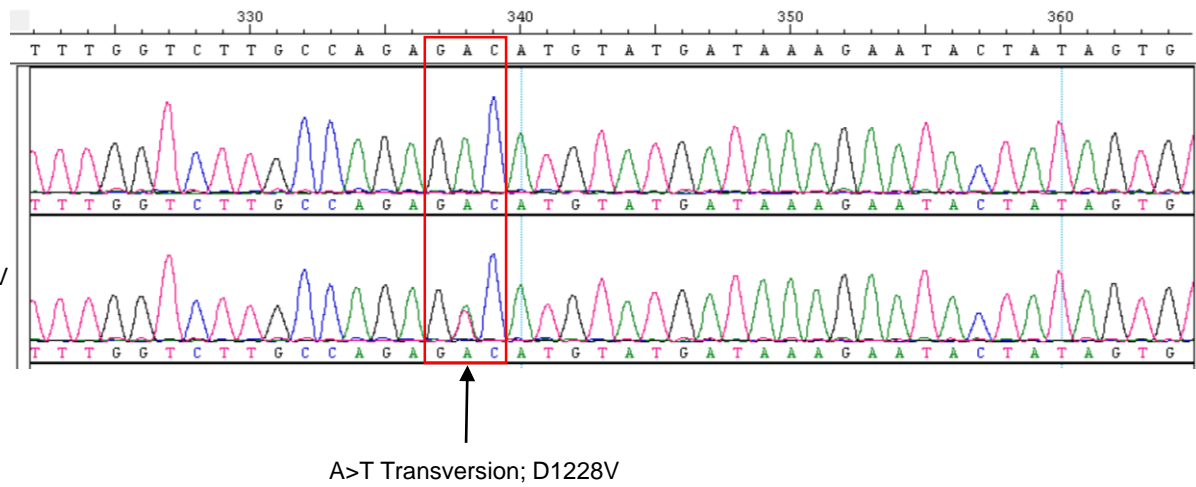

Supplement: NIHMS827170-supplement-4.pdf [file NIHMS827170-supplement-4.pdf]
